# Supplementary material for: RNA-Seq And WGCNA Analysis Identifies Salt-Responsive Genes In Pear (Pyrus Ussuriensis Maxim)
Source: Research Square preprint supplement (doi:10.21203/rs.3.rs-847089/v1), 2021-09-23
Supplement: Supplementary file 1 [file 4405369875900b24b8924d39.xlsx]

## Sheet: Table 1
Table 1 Quality of reads for 18 RNA-seq samples.
Sample name	Raw reads	Clean reads	Clean bases	Total mapped	Uniquely mapped	Q20(%)	GC content(%)
S0_1	47318482	47156934	7.07G	35117368 (74.47%)	31918994 (67.69%)	97.14	46.68
S0_2	48034422	47874066	7.18G	36163125 (75.54%)	32947902 (68.82%)	97.57	46.78
S0_3	43574092	43433040	6.51G	32456476 (74.73%)	29535036 (68%)	97.37	46.79
S4_1	46900492	46745336	7.01G	34486884 (73.78%)	31312874 (66.99%)	97.48	46.41
S4_2	48936866	48785580	7.32G	35307922 (72.37%)	32056999 (65.71%)	97.34	46.44
S4_3	43251610	43098436	6.46G	31690296 (73.53%)	28757066 (66.72%)	97.13	46.66
S6_1	44454732	44331668	6.65G	33043418 (74.54%)	30025757 (67.73%)	97.44	46.62
S6_2	45279668	45119100	6.77G	33195802 (73.57%)	30234431 (67.01%)	97.11	46.71
S6_3	48221830	48075396	7.21G	35791657 (74.45%)	32587764 (67.78%)	97.51	46.65
S12_1	46794844	46655136	7G	34476672 (73.9%)	31246055 (66.97%)	97.63	46.5
S12_2	50199516	50035458	7.51G	36738835 (73.43%)	33243203 (66.44%)	97.53	46.55
S12_3	46384340	46239590	6.94G	34592244 (74.81%)	31365003 (67.83%)	97.51	46.44
S24_1	46637506	46492560	6.97G	35137755 (75.58%)	31928375 (68.67%)	97.36	46.69
S24_2	51389722	51227902	7.68G	38293126 (74.75%)	34739758 (67.81%)	97.09	46.57
S24_3	51451142	51288598	7.69G	38697140 (75.45%)	35109554 (68.45%)	97.38	46.69
S48_1	52599418	52413342	7.86G	38653927 (73.75%)	35158066 (67.08%)	96.11	46.62
S48_2	49473688	49311582	7.4G	37363388 (75.77%)	33919461 (68.79%)	97.49	46.66
S48_3	45031726	44879034	6.73G	33909626 (75.56%)	30830793 (68.7%)	97.29	46.73
